# Supplementary material
Source: publisher figshare collection journal article supplement (https://aacr.figshare.com/articles/dataset/_/22820365)

# Supplementary Figure 4

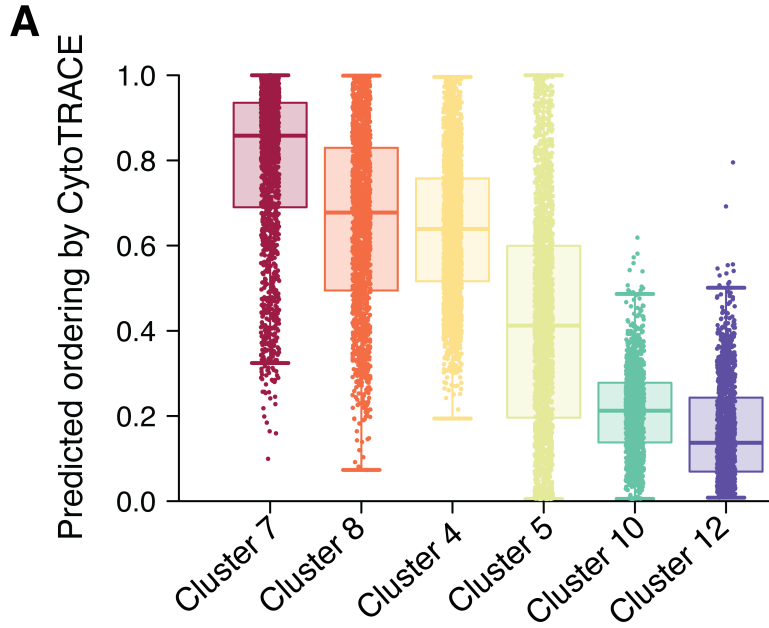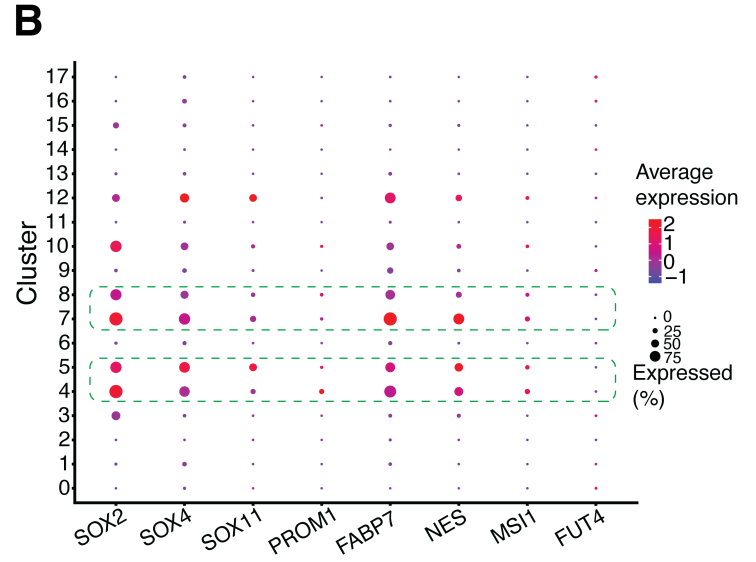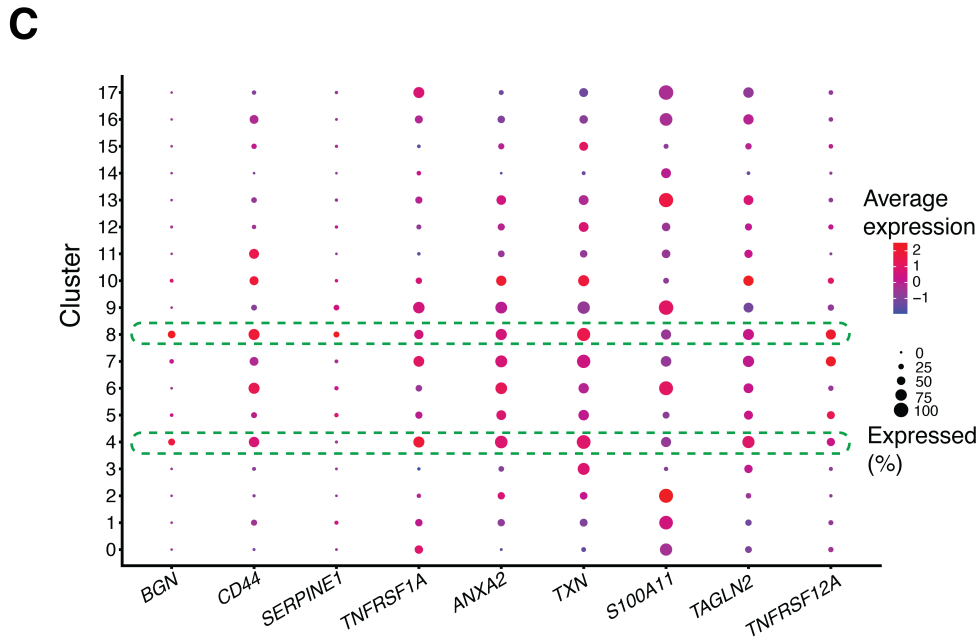

Supplement: Supplementary file 1 [file 40570636]
